# Supplementary material for: Characterization of Two Neutralizing Antibodies against Rift Valley Fever Virus Gn Protein
Source: MDPI journal article supplement (doi:10.3390/v12030259), 2020-02-27
Supplement: s1 [file s1]

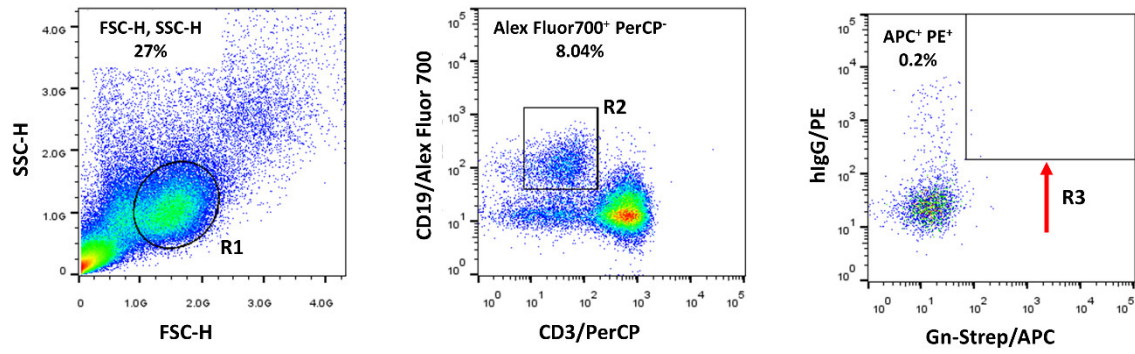

**Supplementary Figure 1.** Gating strategy for the collection of antigen-specific memory B cells. Isolated PBMCs were incubated with the indicated antibodies. Then, the cells were sorted using a MoFlo XDP cell sorter. Cells were first gated based on the FSC-H and SSC-H (R1). Single cells in R1 were further analyzed via marker expression. In this regard, cells showing expression of CD19, but not CD3 were gated out (R2). Finally, cells in R3, showing hIgG and Gn-specific IgG, were antigen-specific memory B cells, and were collected for further analysis. The percentage displayed in each box indicated the proportion of the boxed cells in the last level of parental cells.

Supplementary Table 1. ELISA analysis of binding activity between Gn and  $\kappa$ -type antibodies expressed by HEK293T cells in 96-well plates

| NO. | Clones  | OD 450-630nm | NO. | Clones  | OD 450-630nm |
|-----|---------|--------------|-----|---------|--------------|
| 1   | 1331A5  | 0.0631       | 30  | 1332A8  | 0.6584       |
| 2   | 1331A8  | 0.06         | 31  | 1332A9  | 2.4028       |
| 3   | 1331A9  | 0.0455       | 32  | 1332B1  | 0.0352       |
| 4   | 1331A10 | 0.0471       | 33  | 1332B2  | 1.8322       |
| 5   | 1331B1  | 0.0471       | 34  | 1332B6  | 0.036        |
| 6   | 1331B8  | 0.0469       | 35  | 1332B8  | 0.035        |
| 7   | 1331B9  | 0.0494       | 36  | 1332B9  | 0.9046       |
| 8   | 1331C1  | 0.0492       | 37  | 1332B10 | 0.0542       |
| 9   | 1331C2  | 0.0472       | 38  | 1332B12 | 0.0364       |
| 10  | 1331C3  | 0.0477       | 39  | 1332C2  | 0.0313       |
| 11  | 1331D1  | 0.0542       | 40  | 1332C3  | 0.0281       |
| 12  | 1331D3  | 0.063        | 41  | 1332C7  | 0.0328       |
| 13  | 1331D7  | 0.0516       | 42  | 1332D7  | 0.0305       |
| 14  | 1331D10 | 1.4452       | 43  | 1332D8  | 0.036        |
| 15  | 1331D12 | 0.0515       | 44  | 1332D11 | 0.0315       |
| 16  | 1331E1  | 0.0303       | 45  | 1332E4  | 0.033        |
| 17  | 1331E5  | 1.6005       | 46  | 1332E5  | 0.033        |
| 18  | 1331E6  | 0.0368       | 47  | 1332E10 | 0.035        |
| 19  | 1331F5  | 0.0354       | 48  | 1332F3  | 0.051        |
| 20  | 1331F9  | 0.0345       | 49  | 1332F7  | 0.0593       |
| 21  | 1331F10 | 0.036        | 50  | 1332F8  | 0.0351       |
| 22  | 1331F12 | 0.0372       | 51  | 1332F11 | 1.752        |
| 23  | 1331G1  | 0.0393       | 52  | 1332G8  | 0.0328       |
| 24  | 1331G3  | 0.0489       | 53  | 1332G12 | 0.0275       |
| 25  | 1331G7  | 1.2214       | 54  | 1332H4  | 0.0304       |
| 26  | 1331G8  | 0.0356       | 55  | 1332H5  | 0.0324       |
| 27  | 1331H8  | 0.0314       | 56  | 1332H6  | 0.0305       |
| 28  | 1331H10 | 0.0321       | 57  | 1332H11 | 0.0348       |
| 29  | 1332A1  | 0.0305       |     |         |              |

The supernatants were collected from HEK293T cells co-transfected by linear expression cassettes containing either the full-length Ig heavy- or light-chain to screen the positive clones binding to Gn through ELISA. The positive clones (OD 450-630nm > 0.3) were highlighted with red.

Supplementary Table 2. ELISA analysis of binding activity between Gn and  $\lambda$ -type antibodies expressed by HEK293T cells in 96-well plates

| NO. | Clones  | OD 450-630nm | NO. | Clones  | OD 450-630nm |
|-----|---------|--------------|-----|---------|--------------|
| 1   | 1331A3  | 0.1336       | 25  | 1331F10 | 0.064        |
| 2   | 1331A5  | 0.0511       | 26  | 1331F11 | 1.8082       |
| 3   | 1331A7  | 0.0741       | 27  | 1331F12 | 0.0336       |
| 4   | 1331A8  | 0.0293       | 28  | 1331G1  | 0.0303       |
| 5   | 1331B1  | 0.0374       | 29  | 1331G3  | 0.0296       |
| 6   | 1331B4  | 0.0381       | 30  | 1331G8  | 0.0322       |
| 7   | 1331B5  | 0.0447       | 31  | 1331H9  | 0.0317       |
| 8   | 1331B9  | 0.0416       | 32  | 1331H10 | 0.0329       |
| 9   | 1331B10 | 0.7377       | 33  | 1332A3  | 0.3167       |
| 10  | 1331B12 | 2.1277       | 34  | 1332A9  | 0.0571       |
| 11  | 1331C12 | 0.0485       | 35  | 1332A10 | 0.0346       |
| 12  | 1331D1  | 0.0653       | 36  | 1332A11 | 1.0391       |
| 13  | 1331D2  | 0.0607       | 37  | 1332A12 | 0.0612       |
| 14  | 1331D7  | 0.0422       | 38  | 1332B4  | 0.648        |
| 15  | 1331D11 | 0.0294       | 39  | 1332B9  | 0.0308       |
| 16  | 1331E1  | 0.0333       | 40  | 1332D7  | 0.0291       |
| 17  | 1331E4  | 0.4697       | 41  | 1332E10 | 0.0295       |
| 18  | 1331E6  | 0.0365       | 42  | 1332F2  | 0.0245       |
| 19  | 1331E8  | 0.0331       | 43  | 1332F9  | 0.0303       |
| 20  | 1331E9  | 0.0366       | 44  | 1332G1  | 0.0276       |
| 21  | 1331E12 | 0.0322       | 45  | 1332G11 | 0.0267       |
| 22  | 1331F2  | 0.0558       | 46  | 1332H4  | 0.0443       |
| 23  | 1331F3  | 0.0391       | 47  | 1332H6  | 0.0357       |
| 24  | 1331F9  | 0.0499       |     |         |              |

The supernatants were collected from HEK293T cells co-transfected by linear expression cassettes containing either the full-length Ig heavy- or light-chain to screen the positive clones binding to Gn through ELISA. The positive clones (OD 450-630nm > 0.3) were highlighted with red.

Supplementary Table 3. Germline analysis of isolated NAbs to RVFV Gn

| Antibody | V-H       | D-H      | J-H      | Identity (V-H) | CDR3-H    | V-L      | J-L    | Identity (V-L) | CDR3-L     | SHM (H, D) |
|----------|-----------|----------|----------|----------------|-----------|----------|--------|----------------|------------|------------|
| 1332F11  | HV4-2*01  | HD1-7*01 | HJ5-1*01 | 89.58%         | ARGPGDV   | KV2S8*01 | KJ1*01 | 93.88%         | MQGTLLPWT  | 20, 9      |
| 1331E4   | HV3-18*01 | HD6-1*01 | HJ5-2*02 | 92.86%         | APGGVGTRA | LV6-5*01 | LJ2*01 | 96.23%         | QSYDNSDYWI | 11, 8      |

The *rhesus monkey* germline genes matching the V, D, and J of the heavy-chain (V-H, D-H, and J-H), and V and J of the light-chain (V-L and J-L) from the indicated antibodies. Nucleotide sequence identities with the best-matched V-H and V-L genes are also listed. Complementarity determining region (CDR)3-H are the amino acid sequences of the heavy-chain in the CDR3 region. CDR3-L are the amino acid sequences of the light-chains in the CDR3 region. Total numbers of SHMs in the heavy- and light-chains are listed in the last column.
